# Supplementary material
Source: publisher figshare collection journal article supplement (https://acs.figshare.com/ndownloader/files/4448101)
Supplement: Supplementary file 1 [file 4448101]

## Supporting Information

### 1. Synthesis and characterized of **1** and **3**.

**Synthesis of 3.** Acetyl chloride (8.3 g) was slowly added to the solution of 3-hydroxy-1,1-cyclobutanedicarboxylic acid (5.0 g) in 50mL of acetone at 25°C, and the mixture was stirred at 40-50°C for 4 h. Solvent was removed by rotary evaporation and the white residue was dissolved in 20 mL isopropyl ether. The solution was passed through a 0.2  $\mu$  filter. After the colorless filtrate was condensed at 40°C under reduced pressure to 5mL, a white crystalline product precipitated. The product was filtrated off and dried in a vacuum oven at 60°C. Yield 3.8 g (60%), m.p. 128-129°C. Found (% calculated for  $C_8H_{10}O_6$ ): C 47.2 (47.5), H 4.92 (4.95).  $^1H$ -NMR (dmso, 500.1MHz, ppm): 1.95 (s, 3H,  $CH_3$ ), 2.46 (m, 2H,  $CH_2$ ), 2.76 (m, 2H,  $CH_2$ ), 4.88 (p, 1H,  $CH$ ), 12.97 (s, 2H, 2OH).  $^{13}C$ -NMR (dmso, 100.6MHz, ppm): 20.6 ( $CH_3$ ), 36 ( $CH_2$ ), 48 (C), 63 (CH), 170.0( $CH_3COO$ ), 172.1, 172.8 (2COO).

**Synthesis of 1.** To a suspension of cis-[Pt( $NH_3$ ) $_2$ I $_2$ ] (5.0 g, 8.8 mmol) in 100ml water was added disilver 3-acetoxy-1,1-cyclobutanedicarboxylate **2** (3.08 g, 8.6 mmol), and the reaction mixture was stirred at 40°C for 16 h. After AgI formed was filtrated off, the filtrate was condensed at 40°C under reduced pressure to 10 mL, a white product precipitated and then it was re-crystallized from water, filtrated off, washed with icy water and dried in a vacuum oven at 50°C. Yield 3.6g (50%), m.p.(dec.)152°C. Found (% calculated for  $C_{16}H_{28}N_4O_{12}Pt_2 \cdot H_2O$ ): C 22.1 (21.9), H 3.45 (3.42), N 6.35(6.39), Pt 44.1 (44.5). FAB $^+$ -MS m/z:  $[M-H_2O]^+ = 859(10\%)$ ,  $[(M-H_2O)/2 + \text{glycerine}]^+ = 522(15\%)$ ,  $[(M-H_2O)/2]^+ = 430(100\%)$ ,  $[(M-H_2O)/2 - CH_3COO]^+ = 370(15\%)$ .  $^1H$ -NMR (dmso, 500.1MHz, ppm): 1.97 (s, 6H, 2 $CH_3$ ), 2.53 (m, 4H, 2 $CH_2$ ), 3.21 (m, 4H, 2 $CH_2$ ), 4.14 (s, 12H, 4 $NH_3$ ), 4.64 (s, 2H, 2CH).  $^{13}C$ -NMR (dmso, 100.6MHz, ppm): 21( $CH_3$ ), 38 (( $CH_2$ )), 49 (C), 64 (CH), 170.0( $CH_3COO$ ), 176.4, 176.8 (2COO). FT-IR (KBr,  $cm^{-1}$ ): 3298 (vs,  $\nu(NH_3)$ ), 1722 (m,  $\nu(C=O)$ ), 1639 (vs,  $\nu_a(COO)$ ), 1374 (s,  $\nu_s(COO)$ ).

**2.** The purity for complex **1** (LLC-1401) was assessed by analytical reverse-phase column chromatography (RP-HPLC) on a Waters Associates system (consisting of a 1525 pump, a 717 automated injector, and a Model 2998 photodiode array detector), using Phenomenex- $C_{18}$ , 5- $\mu$ m particle size, 4.6 $\times$ 250mm column. The mobile phase was a MeOH- $H_2O$  (7:93) system, and the flow rate was 1.0ml/min, with monitoring of the peak at 210nm.

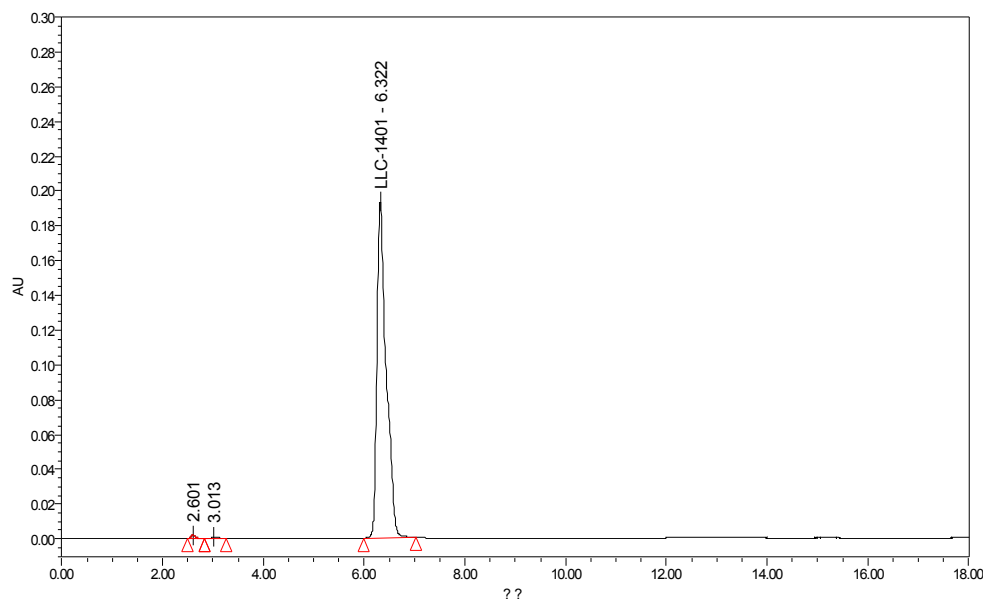

**Figure S1.** Complex 1 (LLC-1401) was assessed by analytical reverse-phase column chromatography (RP-HPLC)

### 3. FAB<sup>+</sup>-MS of complex 1 (LLC-1401) using glycerine as matrix

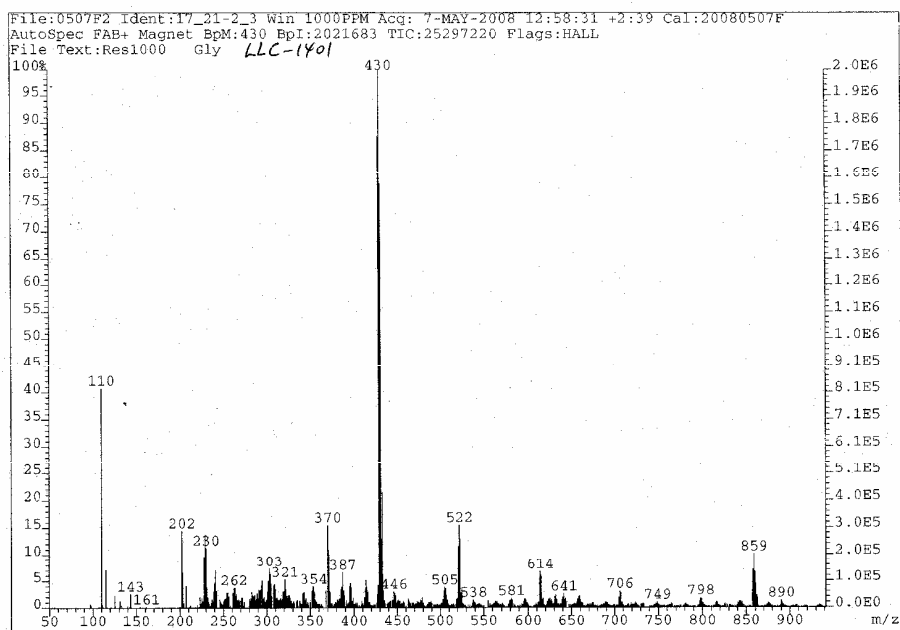

**Figure S2.** FAB<sup>+</sup>-MS of complex 1 (LLC-1401)

### 4. <sup>1</sup>H NMR complex 1 (LLC-1401)

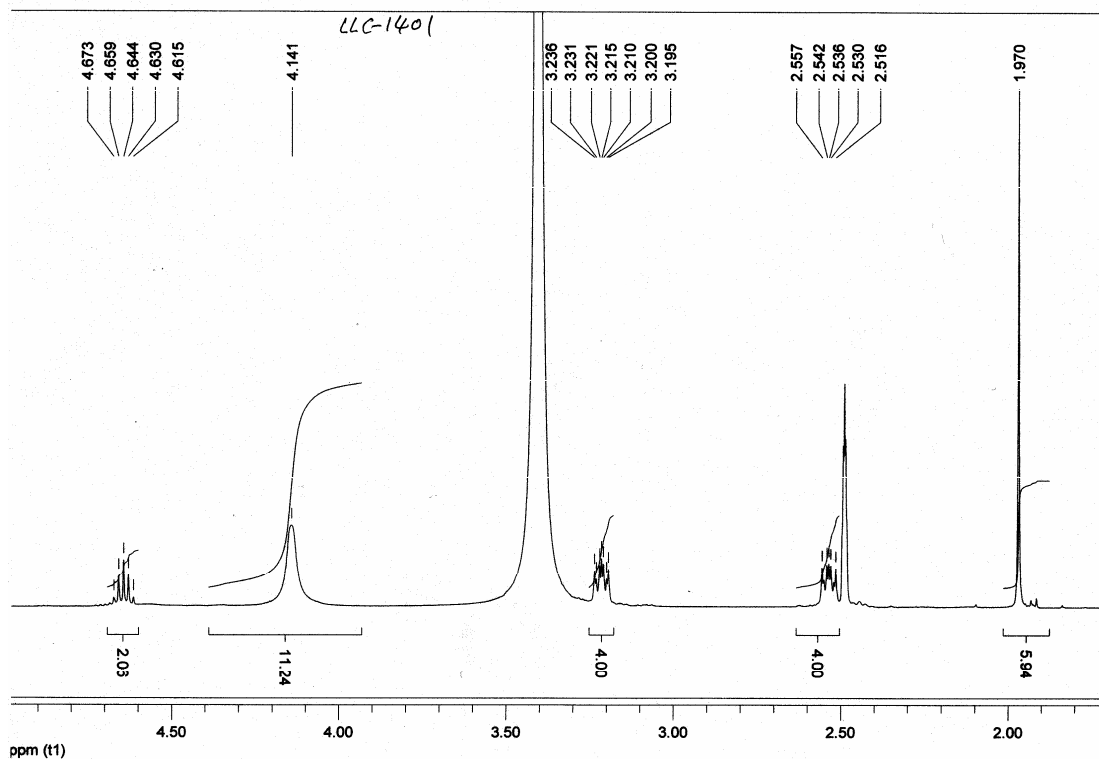

Figure S3  $^1\text{H}$ -NMR(dmsol) of complex 1

## 5. $^{13}\text{C}$ NMR complex 1 (LLC-1401)

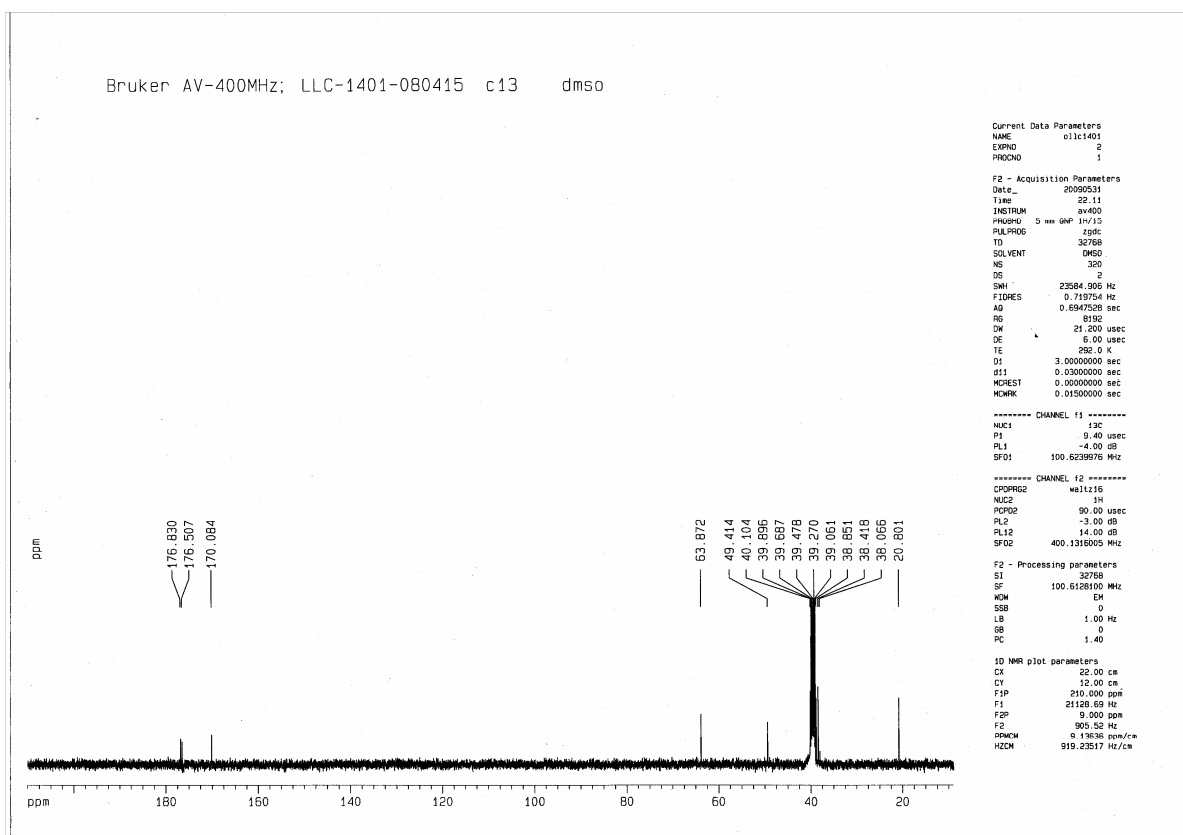

Figure S4.  $^{13}\text{C}$ -NMR(dmsol) of complex 1
